# Supplementary material for: Facile and Eco-Friendly Fabrication of Colored and Bioactive Silk Materials Using Silver Nanoparticles Synthesized by Two Flavonoids
Source: PubMed Central journal article supplement (PMC6415457; doi:10.3390/polym10040404), 2018-04-04
Supplement: polymers-10-00404-s001.pdf [file polymers-10-00404-s001.pdf]

# Supplementary Materials

## Polymers

### Facile and eco-friendly fabrication of colored and bioactive silk materials using silver nanoparticles synthesized by two flavonoids

Yuyang Zhou <sup>1</sup> and Ren-Cheng Tang <sup>1,\*</sup>

<sup>1</sup> National Engineering Laboratory for Modern Silk, College of Textile and Clothing Engineering, Soochow University, 199 Renai Road, Suzhou 215123, China; ldxyzyy@163.com (Y.Z.)

\* Correspondence: tangrencheng@suda.edu.cn (R.-C.T.); Tel.: +86 512 6716 4993

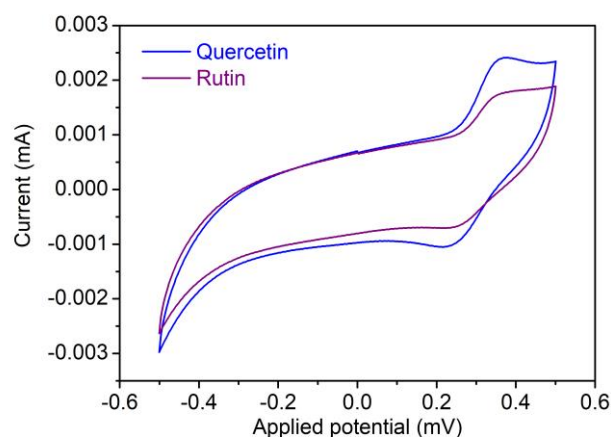

Figure S1. Cyclic voltammograms of flavonoids.

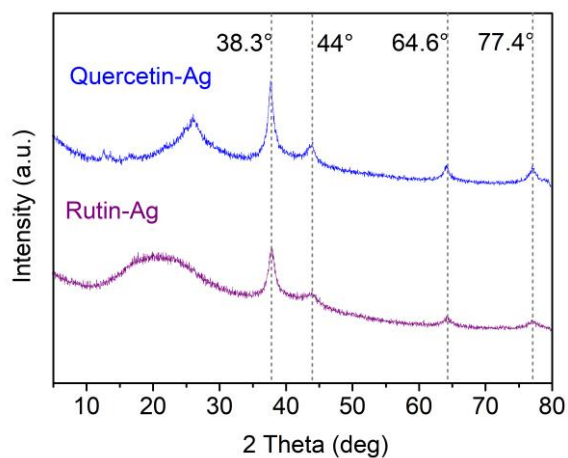

Figure S2. XRD patterns of the AgNPs synthesized using flavonoids.

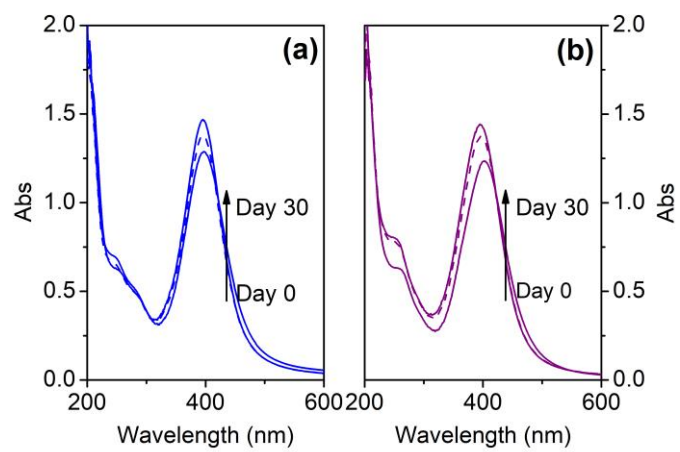

**Figure S3.** Variations of the UV-Vis absorption spectra of the AgNPs solutions as a function of time.
